# Supplementary material
Source: PubMed Central journal article supplement (PMC8414872)
Supplement: NIHMS1621250-supplement-Supp_1.pdf [file NIHMS1621250-supplement-Supp_1.pdf]

Supplementary Materials for “A penalized regression framework for building polygenic risk models based on summary statistics from genome-wide association studies and incorporating external information”

### S.1 Summary Lasso incorporating multiple traits

Consider  $Q$  quantitative traits, each of which has  $n_q$  subjects in GWAS. All studies are assumed to share the same set of  $M$  SNPs. For the  $q^{th}$  trait, let  $\mathbf{Y}_q = (y_{q1}, \dots, y_{qn_q})$  be the phenotypic values and  $\mathbf{X}_q = (x_{qij})$  for  $n_q$  subjects. Let  $\boldsymbol{\beta}_q = (\beta_{q1}, \dots, \beta_{qM})$  be the coefficients for  $M$  SNPs for trait  $q$ . Let  $\mathbf{B} = (\boldsymbol{\beta}_1, \dots, \boldsymbol{\beta}_Q)'$  be the coefficient matrix for all traits. We propose to obtain a sparse PRS by solving the following penalized least squares problem:

$$\sum_{q=1}^Q \frac{1}{2n_q} \|\mathbf{Y}_q - \mathbf{X}_q \boldsymbol{\beta}_q\|_2^2 + \sum_{q=1}^Q \sum_{j=1}^M \lambda_1 |\beta_{qj}| + \sum_{j=1}^M \lambda_2 \log \left( \sum_{q=1}^Q |\beta_{qj}| + \tau \right), \quad (1)$$

where  $\lambda_1 (> 0)$ ,  $\lambda_2 (> 0)$  and  $\tau (> 0)$  are tuning parameters.

The solution to (1) can be obtained by applying a local linear approximation (LLA) and the coordinate descent algorithm. Let  $\mathbf{B}^{(t)} = (\hat{\beta}_{qj}^{(t)})$  denote the estimate at the  $t^{th}$  iteration and

$P_{(\theta=(\lambda_2, \tau))}(\sum_{q=1}^Q |\beta_{qj}|) = \lambda_2 \log(\sum_{q=1}^Q |\beta_{qj}| + \tau)$ . We apply LLA to the log penalty function:

$$P_{(\lambda_2, \tau)}(\sum_{q=1}^Q |\beta_{qj}|) \approx P_{(\lambda_2, \tau)}(\sum_{q=1}^Q |\hat{\beta}_{qj}^{(t)}|) + \sum_{q=1}^Q \frac{\partial P_{(\lambda_2, \tau)}(\sum_{q=1}^Q |\beta_{qj}|)}{\partial |\beta_{qj}|} \Big|_{|\beta_{qj}|=|\hat{\beta}_{qj}^{(t)}|} (|\beta_{qj}| - |\hat{\beta}_{qj}^{(t)}|) = \sum_{q=1}^Q \frac{\lambda_2 |\beta_{qj}|}{\sum_{q=1}^Q |\hat{\beta}_{qj}^{(t)}| + \tau} + \text{Constant}.$$

The objective function (1) becomes

$$U_1(\mathbf{B}|\mathbf{B}^{(t)}) = \sum_{q=1}^Q \frac{1}{2n_q} \|\mathbf{Y}_q - \mathbf{X}_q \boldsymbol{\beta}_q\|_2^2 + \sum_{q=1}^Q \sum_{j=1}^M \left( \lambda_1 + \frac{\lambda_2}{\sum_{q=1}^Q |\hat{\beta}_{qj}^{(t)}| + \tau} \right) |\beta_{qj}|.$$

We update the estimate at the  $(t + 1)^{th}$  iteration by letting  $\frac{\partial}{\partial \beta_{qj}} U_1(\mathbf{B}|\mathbf{B}^{(t)}) = 0$ . Since the penalty is in linear form for  $\beta_{qj}$ , it can be solved by the same coordinate descent algorithm designed for the standard Lasso problem, where the standard Lasso tuning parameter  $\lambda$  is replaced by  $(\lambda_1 + \frac{\lambda_2}{\sum_{q=1}^Q |\hat{\beta}_{qj}^{(t)}| + \tau})$ .

## S.2 SummaryLasso incorporating functional annotations and pleiotropic information

Assume that the GWAS of the  $q^{th}$  trait has  $n_q$  subjects and there exists  $r$  functional annotation categories, we now derive regularized estimates of effect sizes of SNPs for SummaryLasso incorporating functional annotations and pleiotropic information by minimizing the following cost function using a similar coordinate descent algorithm:

$$\sum_{q=1}^Q \frac{1}{2n_q} \|\mathbf{Y}_q - \mathbf{X}_q \boldsymbol{\beta}_q\|_2^2 + \sum_{q=1}^Q \sum_{j=1}^M \left( \lambda_0 + \sum_{s=1}^r \lambda_s R_{js} \right) |\beta_{qj}| + \sum_{j=1}^M \lambda \log \left( \sum_{q=1}^Q |\beta_{qj}| + \tau \right).$$

Similarly, based on the same local linear approximation applied to  $\lambda \log(\sum_{q=1}^Q |\beta_{qj}| + \tau)$  presented in the previous section, the above objective function becomes

$$U_2(\mathbf{B}|\mathbf{B}^{(t)}) = \sum_{q=1}^Q \frac{1}{2n_q} \|\mathbf{Y}_q - \mathbf{X}_q \boldsymbol{\beta}_q\|_2^2 + \sum_{q=1}^Q \sum_{j=1}^M \left( \lambda_0 + \sum_{s=1}^r \lambda_s R_{js} + \frac{\lambda}{\sum_{q=1}^Q |\hat{\beta}_{qj}^{(t)}| + \tau} \right) |\beta_{qj}|.$$

Since the penalty is in linear form for  $\beta_{qj}$ , it can be solved by the same coordinate descent algorithm for the standard Lasso problem, where the standard Lasso tuning parameter  $\lambda$  is replaced by  $(\lambda_0 + \sum_{s=1}^r \lambda_s R_{js} + \frac{\lambda}{\sum_{q=1}^Q |\hat{\beta}_{qj}^{(t)}| + \tau})$ . Therefore, the procedure for SummaryLasso follows.

### S.3 Enrichment analysis of the 16 secondary traits for type 2 diabetes

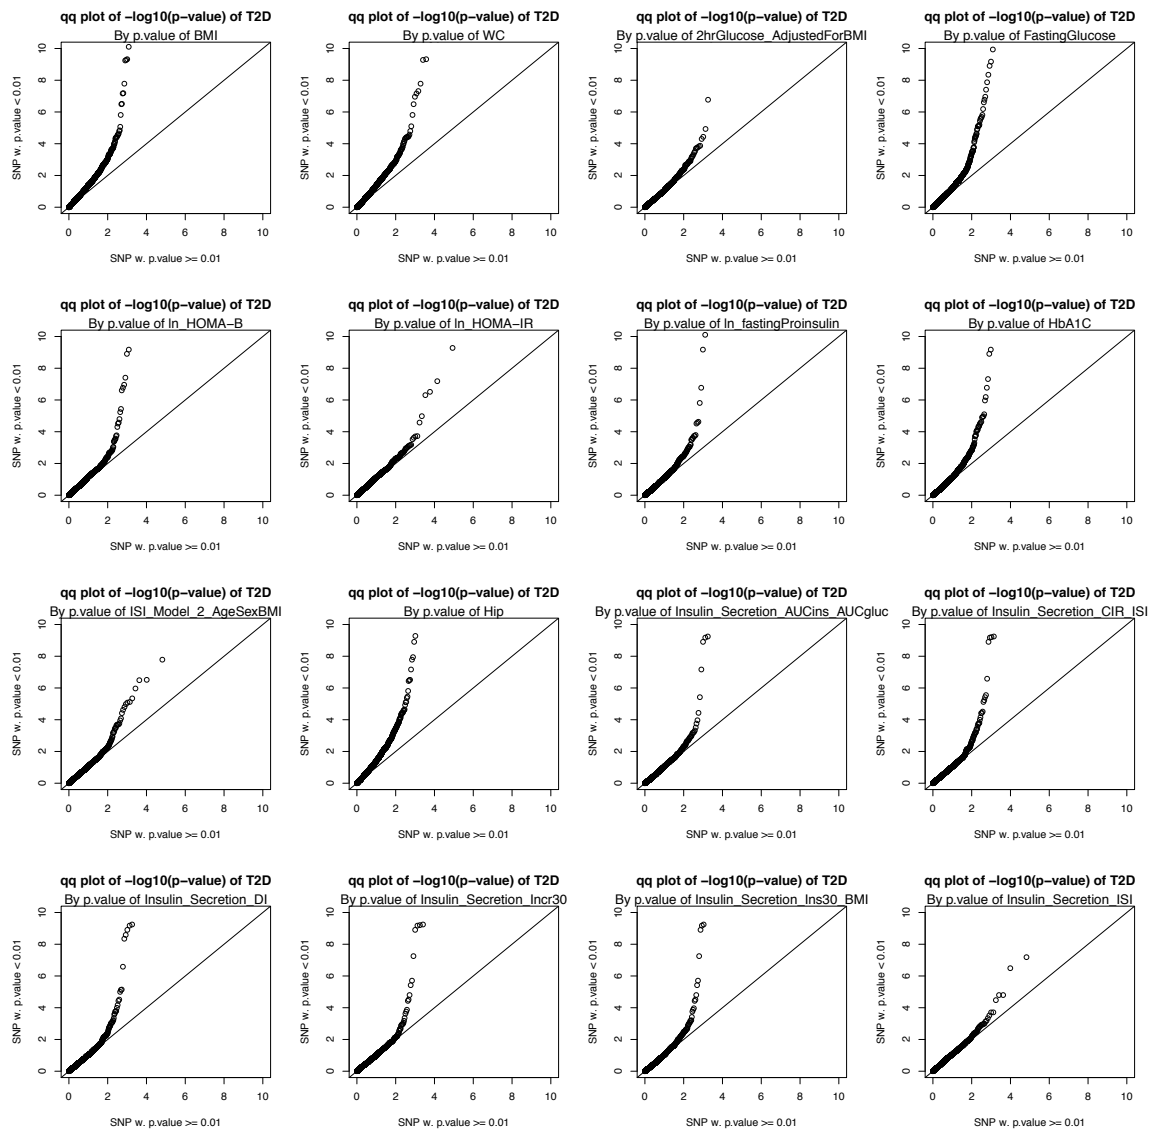

Figure S.1. Enrichment analysis of the sixteen secondary traits for type 2 diabetes. For a given secondary trait, SNPs can be classified into two groups: one group has p-value less than 0.01 (denoted as  $S_1$ ) and the other group has p-value  $> 0.01$ . Here,  $S_1$  represents SNPs that are more likely to be associated with the trait and  $S_2$  represents SNPs that are less likely to be associated with the trait. We then made a quantile-quantile plot, comparing T2D association p-values for SNPs in  $S_1$  and in  $S_2$ . If the secondary trait shares genetic basis with T2D, the QQ plot would deviate from the expected 45-degree line. To minimize the artifact of linkage disequilibrium (LD), we performed LD-pruning using PLINK with  $r^2 = 0.1$ . The sixteen traits include the three traits from the GIANT consortium website: BMI, WC = waist circumference, Hip = hip measurement and the remaining traits from MAGIC (the Meta-Analyses of Glucose and Insulin-related traits Consortium) website, where the names described in the Figures can be matched to the information of traits on the MAGIC website.

Supplementary Table 1. The difference  $\Delta$  of  $R^2$  and its 95% confidence interval for each pair of methods, estimated based on 200 simulations ( $M_1 = 1250$ ). Significance for testing if  $\Delta = 0$  is also reported.

|         | PTWC                               | LD-Pred                               | PANPRS                                 | PANPRS-Func                        |
|---------|------------------------------------|---------------------------------------|----------------------------------------|------------------------------------|
| PT      | 1.83%<br>(1.7%, 1.9%)<br>< 2.2e-16 | 1.67%<br>(1.5%, 1.8%)<br>< 2.2e-16    | 1.63%<br>(1.4%, 1.8%)<br>< 2.2e-16     | 3.16%<br>(2.9%, 3.4%)<br>< 2.2e-16 |
| PTWC    |                                    | -0.16%<br>(-0.28%, -0.036%)<br>0.0057 | -0.202%<br>(-0.4%, -0.00074%)<br>0.025 | 1.33%<br>(1.1%, 1.5%)<br>< 2.2e-16 |
| LD-Pred |                                    |                                       | -0.0422%<br>(-0.28%, 0.20%)<br>0.37    | 1.49%<br>(1.3%, 1.7%)<br>< 2.2e-16 |
| PANPRS  |                                    |                                       |                                        | 1.53%<br>(1.5%, 1.6%)<br>< 2.2e-16 |

PANPRS: Single trait analysis, without functional annotation data.

PANPRS-Func: PANPRS incorporating functional annotation data.

Supplementary Table 2. The difference  $\Delta$  of  $R^2$  and its 95% confidence interval for each pair of methods, estimated based on 200 simulations ( $M_1 = 2500$ ). Significance for testing if  $\Delta = 0$  is also reported.

|         | PTWC                                  | LD-Pred                                  | PANPRS                               | PANPRS-Func                        |
|---------|---------------------------------------|------------------------------------------|--------------------------------------|------------------------------------|
| PT      | 0.932%<br>(0.88%, 0.98%) <<br>2.2e-16 | 0.829%<br>(0.76%, 0.9%)<br>< 2.2e-16     | 1.32%<br>(1.2%, 1.5%)<br>< 2.2e-16   | 2.58%<br>(2.4%, 2.7%)<br>< 2.2e-16 |
| PTWC    |                                       | -0.104%<br>(-0.15%, -0.058%)<br>4.04e-06 | 0.39%<br>(0.25%, 0.53%)<br>2.7e-08   | 1.65%<br>(1.5%, 1.8%)<br>< 2.2e-16 |
| LD-Pred |                                       |                                          | 0.493%<br>(0.35%, 0.63%)<br>4.16e-12 | 1.75%<br>(1.6%, 1.9%)<br>< 2.2e-16 |
| PANPRS  |                                       |                                          |                                      | 1.26%<br>(1.2%, 1.3%)<br>< 2.2e-16 |

PANPRS: Single trait analysis, without functional annotation data.

PANPRS-Func: PANPRS incorporating functional annotation data.

Supplementary Table 3. The difference  $\Delta$  of  $R^2$  and its 95% confidence interval for each pair of methods, estimated based on 200 simulations ( $M_1 = 1250, \gamma = 0.3, \rho = 0.5$ ). Significance for testing if  $\Delta = 0$  is also reported.

|                        | PANPRS-2traits                       | PANPRS-Func<br>2traits              | PANPRS-4traits                         | PANPRS-Func<br>4traits               |
|------------------------|--------------------------------------|-------------------------------------|----------------------------------------|--------------------------------------|
| PT                     | 2.85%<br>(2.7%, 3.0%)<br>< 2.2e-16   | 4.18%<br>(4.0%, 4.3%)<br>< 2.2e-16  | 3.79%<br>(3.6%, 3.9%)<br>< 2.2e-16     | 5.02%<br>(4.9%, 5.2%)<br>< 2.2e-16   |
| PTWC                   | 1.02%<br>(0.94%, 1.1%)<br>< 2.2e-16  | 2.35%<br>(2.3%, 2.4%)<br>< 2.2e-16  | 1.96%<br>(1.9%, 2%)<br>< 2.2e-16       | 3.19%<br>(3.1%, 3.3%)<br>< 2.2e-16   |
| LD-Pred                | 1.18%<br>(1.0%, 1.3%)<br>< 2.2e-16   | 2.51%<br>(2.4%, 2.7%)<br>< 2.2e-16  | 2.12%<br>(2%, 2.3%)<br>< 2.2e-16       | 3.35%<br>(3.2%, 3.5%)<br>< 2.2e-16   |
| PANPRS                 | 1.22%<br>(1.0%, 1.4%)<br>< 2.2e-16   | 2.55%<br>(2.3%, 2.8%)<br>< 2.2e-16  | 2.16%<br>(1.9%, 2.4%)<br>< 2.2e-16     | 3.39%<br>(3.2%, 3.6%)<br>< 2.2e-16   |
| PANPRS-Func            | -0.305%<br>(-0.51%, -0.1%)<br>0.0016 | 1.02%<br>(0.82%, 1.2%)<br>< 2.2e-16 | 0.631%<br>(0.41%, 0.85%)<br>1.1e-08    | 1.86%<br>(1.7%, 2.1%)<br>< 2.2e-16   |
| PANPRS-<br>2traits     |                                      | 1.33%<br>(1.2%, 1.4%)<br>< 2.2e-16  | 0.936%<br>(0.86%, 1%)<br>< 2.2e-16     | 2.17%<br>(2.1%, 2.3%)<br>< 2.2e-16   |
| PANPRS-Func<br>2traits |                                      |                                     | -0.391%<br>(-0.49%, -0.29%)<br>6.4e-15 | 0.84%<br>(0.76%, 0.92%)<br>< 2.2e-16 |
| PANPRS-<br>4traits     |                                      |                                     |                                        | 1.23%<br>(1.1%, 1.3%)<br>< 2.2e-16   |

PANPRS-Func: PANPRS with functional annotation data

PANPRS- 2 traits: PANPRS with 2 secondary traits

PANPRS- 4 traits: PANPRS with 4 secondary traits

PANPRS-Func-2 traits: PANPRS with functional annotation data and 2 secondary traits

PANPRS-Func-4 traits: PANPRS with functional annotation data and 4 secondary traits

Supplementary Table 4. The difference  $\Delta$  of  $R^2$  and its 95% confidence interval for each pair of methods, estimated based on 200 simulations ( $M_1 = 1250, \gamma = 0.3, \rho = 0.8$ ). Significance for testing if  $\Delta = 0$  is also reported.

|                         | PANPRS-2traits                      | PANPRS-Func<br>2traits             | PANPRS-4traits                        | PANPRS-Func 4traits                   |
|-------------------------|-------------------------------------|------------------------------------|---------------------------------------|---------------------------------------|
| PT                      | 3.71%<br>(3.6%, 3.8%)<br>< 2.2e-16  | 4.98%<br>(4.8%, 5.1%)<br>< 2.2e-16 | 4.58%<br>(4.4%, 4.7%)<br>< 2.2e-16    | 5.86%<br>(5.7%, 6%)<br>< 2.2e-16      |
| PTWC                    | 1.88%<br>(1.8%, 2.0%)<br>< 2.2e-16  | 3.14%<br>(3.1%, 3.2%)<br>< 2.2e-16 | 2.75%<br>(2.7%, 2.8%)<br>< 2.2e-16    | 4.03%<br>(3.9%, 4.2%)<br>< 2.2e-16    |
| LD-Pred                 | 2.04%<br>(1.9%, 2.2%)<br>< 2.2e-16  | 3.31%<br>(3.2%, 3.5%)<br>< 2.2e-16 | 2.91%<br>(2.8%, 3.1%)<br>< 2.2e-16    | 4.19%<br>(4%, 4.4%)<br>< 2.2e-16      |
| PANPRS                  | 2.08%<br>(1.9%, 2.3%)<br>< 2.2e-16  | 3.35%<br>(3.1%, 3.6%)<br>< 2.2e-16 | 2.95%<br>(2.7%, 3.2%)<br>< 2.2e-16    | 4.23%<br>(4%, 4.5%)<br>< 2.2e-16      |
| PANPRS-<br>Func         | 0.551%<br>(0.34%, 0.76%)<br>8.6e-08 | 1.82%<br>(1.6%, 2%)<br>< 2.2e-16   | 1.42%<br>(1.2%, 1.6%)<br>< 2.2e-16    | 2.7%<br>(2.5%, 2.9%)<br>< 2.2e-16     |
| PANPRS-<br>2traits      |                                     | 1.27%<br>(1.2%, 1.3%)<br>< 2.2e-16 | 0.869%<br>(0.78%, 0.95%) <<br>2.2e-16 | 2.15%<br>(2%, 2.3%)<br>< 2.2e-16      |
| PANPRS-<br>Func 2traits |                                     |                                    | -0.397%<br>(-0.5%, -0.3%)<br>7.8e-16  | 0.886%<br>(0.78%, 0.99%)<br>< 2.2e-16 |
| PANPRS-<br>4traits      |                                     |                                    |                                       | 1.28%<br>(1.2%, 1.4%)<br>< 2.2e-16    |

PANPRS-Func: PANPRS with functional annotation

PANPRS- 2 traits: PANPRS with 2 secondary traits

PANPRS- 4 traits: PANPRS with 4 secondary traits

PANPRS-Func-2 traits: PANPRS with functional annotation and 2 secondary traits

PANPRS-Func-4 traits: PANPRS with functional annotation and 4 secondary traits

Supplementary Table 5. The difference  $\Delta$  of  $R^2$  and its 95% confidence interval for each pair of methods, estimated based on 200 simulations ( $M_1 = 1250, \gamma = 0.7, \rho = 0.5$ ). Significance for testing if  $\Delta = 0$  is also reported.

|                        | PANPRS-2traits                        | PANPRS-Func<br>2traits              | PANPRS-4traits                       | PANPRS-Func<br>4traits             |
|------------------------|---------------------------------------|-------------------------------------|--------------------------------------|------------------------------------|
| PT                     | 2.54%<br>(2.4%, 2.7%)<br>< 2.2e-16    | 3.67%<br>(3.5%, 3.8%)<br>< 2.2e-16  | 4.19%<br>(4.1%, 4.3%)<br>< 2.2e-16   | 5.67%<br>(5.5%, 5.8%)<br>< 2.2e-16 |
| PTWC                   | 0.708%<br>(0.63%, 0.79%) <<br>2.2e-16 | 1.84%<br>(1.7%, 2%)<br>< 2.2e-16    | 2.36%<br>(2.3%, 2.5%)<br>< 2.2e-16   | 3.84%<br>(3.7%, 3.9%)<br>< 2.2e-16 |
| LD-Pred                | 0.869%<br>(0.71%, 1%)<br>< 2.2e-16    | 2%<br>(1.8%, 2.2%)<br>< 2.2e-16     | 2.52%<br>(2.4%, 2.7%)<br>< 2.2e-16   | 4%<br>(3.8%, 4.2%)<br>< 2.2e-16    |
| PANPRS                 | 0.911%<br>(0.69%, 1.1%)<br>1.1e-15    | 2.04%<br>(1.8%, 2.3%)<br>< 2.2e-16  | 2.56%<br>(2.4%, 2.8%)<br>< 2.2e-16   | 4.04%<br>(3.8%, 4.3%)<br>< 2.2e-16 |
| PANPRS-Func            | -0.619%<br>(-0.84%, -0.4%)<br>1.4e-08 | 0.508%<br>(0.27%, 0.75%)<br>1.7e-05 | 1.03%<br>(0.83%, 1.2%)<br>< 2.2e-16  | 2.51%<br>(2.3%, 2.7%)<br>< 2.2e-16 |
| PANPRS-2traits         |                                       | 1.13%<br>(1%, 1.2%)<br>< 2.2e-16    | 1.65%<br>(1.6%, 1.7%)<br>< 2.2e-16   | 3.13%<br>(3%, 3.2%)<br>< 2.2e-16   |
| PANPRS-Func<br>2traits |                                       |                                     | 0.524%<br>(0.4%, 0.65%)<br>< 2.2e-16 | 2%<br>(1.9%, 2.1%)<br>< 2.2e-16    |
| PANPRS-4traits         |                                       |                                     |                                      | 1.48%<br>(1.4%, 1.6%)<br>< 2.2e-16 |

PANPRS-Func: PANPRS with functional annotation

PANPRS- 2 traits: PANPRS with 2 secondary traits

PANPRS- 4 traits: PANPRS with 4 secondary traits

PANPRS-Func-2 traits: PANPRS with functional annotation and 2 secondary traits

PANPRS-Func-4 traits: PANPRS with functional annotation and 4 secondary traits



Supplementary Table 6. The difference  $\Delta$  of  $R^2$  and its 95% confidence interval for each pair of methods, estimated based on 200 simulations ( $M_1 = 1250, \gamma = 0.7, \rho = 0.8$ ). Significance for testing if  $\Delta = 0$  is also reported.

|                        | PANPRS-2traits                      | PANPRS-Func<br>2traits                | PANPRS-4traits                     | PANPRS-Func<br>4traits             |
|------------------------|-------------------------------------|---------------------------------------|------------------------------------|------------------------------------|
| PT                     | 3.35%<br>(3.2%, 3.5%)<br>< 2.2e-16  | 4.19%<br>(4%, 4.4%)<br>< 2.2e-16      | 5.15%<br>(5%, 5.3%)<br>< 2.2e-16   | 6.38%<br>(6.2%, 6.6%)<br>< 2.2e-16 |
| PTWC                   | 1.52%<br>(1.4%, 1.6%)<br>< 2.2e-16  | 2.36%<br>(2.2%, 2.5%)<br>< 2.2e-16    | 3.32%<br>(3.2%, 3.4%)<br>< 2.2e-16 | 4.55%<br>(4.4%, 4.7%)<br>< 2.2e-16 |
| LD-Pred                | 1.68%<br>(1.5%, 1.8%)<br>< 2.2e-16  | 2.52%<br>(2.3%, 2.7%)<br>< 2.2e-16    | 3.48%<br>(3.3%, 3.7%)<br>< 2.2e-16 | 4.71%<br>(4.5%, 4.9%)<br>< 2.2e-16 |
| PANPRS                 | 1.72%<br>(1.5%, 1.9%)<br>< 2.2e-16  | 2.56%<br>(2.3%, 2.8%)<br>< 2.2e-16    | 3.53%<br>(3.3%, 3.8%)<br>< 2.2e-16 | 4.76%<br>(4.5%, 5%)<br>< 2.2e-16   |
| PANPRS-Func            | 0.188%<br>(-0.035%, 0.41%)<br>0.049 | 1.03%<br>(0.79%, 1.3%)<br>< 2.2e-16   | 2%<br>(1.8%, 2.2%)<br>< 2.2e-16    | 3.23%<br>(3%, 3.5%)<br>< 2.2e-16   |
| PANPRS-<br>2traits     |                                     | 0.845%<br>(0.74%, 0.95%) <<br>2.2e-16 | 1.81%<br>(1.7%, 1.9%)<br>< 2.2e-16 | 3.04%<br>(2.9%, 3.1%)<br>< 2.2e-16 |
| PANPRS-Func<br>2traits |                                     |                                       | 0.962% (0.85%,<br>1.1%) < 2.2e-16  | 2.19%<br>(2.1%, 2.3%)<br>< 2.2e-16 |
| PANPRS-<br>4traits     |                                     |                                       |                                    | 1.23%<br>(1.1%, 1.3%)<br>< 2.2e-16 |

PANPRS-Func: PANPRS with functional annotation

PANPRS- 2 traits: PANPRS with 2 secondary traits

PANPRS- 4 traits: PANPRS with 4 secondary traits

PANPRS-Func-2 traits: PANPRS with functional annotation and 2 secondary traits

PANPRS-Func-4 traits: PANPRS with functional annotation and 4 secondary traits

Supplementary Table 7. The difference  $\Delta$  of  $R^2$  and its 95% confidence interval for each pair of methods, estimated based on 200 simulations ( $M_1 = 2500, \gamma = 0.3, \rho = 0.5$ ). Significance for testing if  $\Delta = 0$  is also reported.

|                        | PANPRS-2traits                        | PANPRS-Func<br>2traits               | PANPRS-4traits                           | PANPRS-Func<br>4traits               |
|------------------------|---------------------------------------|--------------------------------------|------------------------------------------|--------------------------------------|
| PT                     | 1.72%<br>(1.7%, 1.8%)<br>< 2.2e-16    | 2.89%<br>(2.8%, 3%)<br>< 2.2e-16     | 1.88%<br>(1.8%, 2%)<br>< 2.2e-16         | 3.08%<br>(3%, 3.2%)<br>< 2.2e-16     |
| PTWC                   | 0.789%<br>(0.73%, 0.84%) <<br>2.2e-16 | 1.96%<br>(1.9%, 2%)<br>< 2.2e-16     | 0.949%<br>(0.89%, 1%)<br>< 2.2e-16       | 2.15%<br>(2.1%, 2.2%)<br>< 2.2e-16   |
| LD-Pred                | 0.892%<br>(0.82%, 0.97%) <<br>2.2e-16 | 2.07%<br>(2%, 2.2%)<br>< 2.2e-16     | 1.05%<br>(0.98%, 1.1%)<br>< 2.2e-16      | 2.25%<br>(2.2%, 2.3%)<br>< 2.2e-16   |
| PANPRS                 | 0.399%<br>(0.25%, 0.54%)<br>4.18e-08  | 1.57%<br>(1.4%, 1.7%)<br>< 2.2e-16   | 0.559%<br>(0.41%, 0.71%)<br>2.03e-13     | 1.76%<br>(1.6%, 1.9%)<br>< 2.2e-16   |
| PANPRS-Func            | -0.859%<br>(-1%, -0.71%)<br>< 2.2e-16 | 0.314%<br>(0.16%, 0.46%)<br>2.05e-05 | -0.699%<br>(-0.85%, -0.54%) <<br>2.2e-16 | 0.501%<br>(0.34%, 0.66%)<br>7.57e-10 |
| PANPRS-<br>2traits     |                                       | 1.17%<br>(1.1%, 1.3%)<br>< 2.2e-16   | 0.16%<br>(0.12%, 0.2%)<br>1.63e-14       | 1.36%<br>(1.3%, 1.4%)<br>< 2.2e-16   |
| PANPRS-Func<br>2traits |                                       |                                      | -1.01%<br>(-1.1%, -0.93%)<br>< 2.2e-16   | 0.187%<br>(0.12%, 0.25%)<br>2.51e-08 |
| PANPRS-<br>4traits     |                                       |                                      |                                          | 1.2%<br>(1.1%, 1.3%)<br>< 2.2e-16    |

PANPRS-Func: PANPRS with functional annotation

PANPRS- 2 traits: PANPRS with 2 secondary traits

PANPRS- 4 traits: PANPRS with 4 secondary traits

PANPRS-Func-2 traits: PANPRS with functional annotation and 2 secondary traits

PANPRS-Func-4 traits: PANPRS with functional annotation and 4 secondary traits

Supplementary Table 8. The difference  $\Delta$  of  $R^2$  and its 95% confidence interval for each pair of methods, estimated based on 200 simulations ( $M_1 = 2500, \gamma = 0.3, \rho = 0.8$ ). Significance for testing if  $\Delta = 0$  is also reported.

|                     | PANPRS-2traits                           | PANPRS-Func<br>2traits               | PANPRS-4traits                          | PANPRS-Func<br>4traits                |
|---------------------|------------------------------------------|--------------------------------------|-----------------------------------------|---------------------------------------|
| PT                  | 1.75%<br>(1.7%, 1.8%)<br>< 2.2e-16       | 2.97%<br>(2.9%, 3.1%)<br>< 2.2e-16   | 2.17%<br>(2.1%, 2.2%)<br>< 2.2e-16      | 3.51%<br>(3.4%, 3.6%)<br>< 2.2e-16    |
| PTWC                | 0.819%<br>(0.77%, 0.87%)<br>< 2.2e-16    | 2.03%<br>(1.9%, 2.1%)<br>< 2.2e-16   | 1.24%<br>(1.2%, 1.3%)<br>< 2.2e-16      | 2.58%<br>(2.5%, 2.7%)<br>< 2.2e-16    |
| LD-Pred             | 0.922%<br>(0.86%, 0.99%)<br>< 2.2e-16    | 2.14%<br>(2%, 2.2%)<br>< 2.2e-16     | 1.35%<br>(1.3%, 1.4%)<br>< 2.2e-16      | 2.68%<br>(2.6%, 2.8%)<br>< 2.2e-16    |
| PANPRS              | 0.429%<br>(0.28%, 0.57%)<br>3.45e-09     | 1.64%<br>(1.5%, 1.8%)<br>< 2.2e-16   | 0.852%<br>(0.71%, 1%)<br>< 2.2e-16      | 2.19%<br>(2%, 2.3%)<br>< 2.2e-16      |
| PANPRS-Func         | -0.829%<br>(-0.98%, -0.68%) <<br>2.2e-16 | 0.386%<br>(0.24%, 0.53%)<br>1.74e-07 | -0.406%<br>(-0.56%, -0.25%)<br>6.92e-08 | 0.932%<br>(0.77%, 1.1%)<br>< 2.2e-16  |
| PANPRS-2traits      |                                          | 1.21%<br>(1.1%, 1.3%)<br>< 2.2e-16   | 0.423%<br>(0.37%, 0.48%)<br>< 2.2e-16   | 1.76%<br>(1.7%, 1.8%)<br>< 2.2e-16    |
| PANPRS-Func 2traits |                                          |                                      | -0.792%<br>(-0.89%, -0.7%)<br>< 2.2e-16 | 0.546%<br>(0.48%, 0.62%) <<br>2.2e-16 |
| PANPRS-4traits      |                                          |                                      |                                         | 1.34%<br>(1.3%, 1.4%)<br>< 2.2e-16    |

PANPRS-Func: PANPRS with functional annotation

PANPRS- 2 traits: PANPRS with 2 secondary traits

PANPRS- 4 traits: PANPRS with 4 secondary traits

PANPRS-Func-2 traits: PANPRS with functional annotation and 2 secondary traits

PANPRS-Func-4 traits: PANPRS with functional annotation and 4 secondary traits

Supplementary Table 9. The difference  $\Delta$  of  $R^2$  and its 95% confidence interval for each pair of methods, estimated based on 200 simulations ( $M_1 = 2500, \gamma = 0.7, \rho = 0.5$ ). Significance for testing if  $\Delta = 0$  is also reported.

|                         | PANPRS-2traits                          | PANPRS-Func<br>2traits                | PANPRS-4traits                          | PANPRS-Func 4traits                  |
|-------------------------|-----------------------------------------|---------------------------------------|-----------------------------------------|--------------------------------------|
| PT                      | 2.08%<br>(2%, 2.2%)<br>< 2.2e-16        | 3.37%<br>(3.3%, 3.5%)<br>< 2.2e-16    | 2.55%<br>(2.5%, 2.6%)<br>< 2.2e-16      | 3.69%<br>(3.6%, 3.8%)<br>< 2.2e-16   |
| PTWC                    | 1.14%<br>(1.1%, 1.2%)<br>< 2.2e-16      | 2.43%<br>(2.3%, 2.5%)<br>< 2.2e-16    | 1.62%<br>(1.5%, 1.7%)<br>< 2.2e-16      | 2.76%<br>(2.7%, 2.8%)<br>< 2.2e-16   |
| LD-Pred                 | 1.25%<br>(1.2%, 1.3%)<br>< 2.2e-16      | 2.54%<br>(2.4%, 2.7%)<br>< 2.2e-16    | 1.72%<br>(1.6%, 1.8%)<br>< 2.2e-16      | 2.86%<br>(2.8%, 3%)<br>< 2.2e-16     |
| PANPRS                  | 0.755%<br>(0.61%, 0.9%)<br>< 2.2e-16    | 2.04%<br>(1.9%, 2.2%)<br>< 2.2e-16    | 1.23%<br>(1.1%, 1.4%)<br>< 2.2e-16      | 2.37%<br>(2.2%, 2.5%)<br>< 2.2e-16   |
| PANPRS-<br>Func         | -0.503%<br>(-0.66%, -0.35%)<br>5.16e-11 | 0.787%<br>(0.63%, 0.94%) <<br>2.2e-16 | -0.0273%<br>(-0.18%, 0.13%)<br>0.366    | 1.11%<br>(0.95%, 1.3%)<br>< 2.2e-16  |
| PANPRS-<br>2traits      |                                         | 1.29%<br>(1.2%, 1.4%)<br>< 2.2e-16    | 0.476%<br>(0.42%, 0.53%) <<br>2.2e-16   | 1.61%<br>(1.5%, 1.7%)<br>< 2.2e-16   |
| PANPRS-<br>Func 2traits |                                         |                                       | -0.814%<br>(-0.9%, -0.73%) <<br>2.2e-16 | 0.325%<br>(0.25%, 0.4%)<br>< 2.2e-16 |
| PANPRS-<br>4traits      |                                         |                                       |                                         | 1.14%<br>(1.1%, 1.2%)<br>< 2.2e-16   |

PANPRS-Func: PANPRS with functional annotation

PANPRS- 2 traits: PANPRS with 2 secondary traits

PANPRS- 4 traits: PANPRS with 4 secondary traits

PANPRS-Func-2 traits: PANPRS with functional annotation and 2 secondary traits

PANPRS-Func-4 traits: PANPRS with functional annotation and 4 secondary traits

Supplementary Table 10. The difference  $\Delta$  of  $R^2$  and its 95% confidence interval for each pair of methods, estimated based on 200 simulations ( $M_1 = 2500, \gamma = 0.7, \rho = 0.8$ ). Significance for testing if  $\Delta = 0$  is also reported.

|                        | PANPRS-2traits                       | PANPRS-Func<br>2traits              | PANPRS-4traits                        | PANPRS-Func<br>4traits                |
|------------------------|--------------------------------------|-------------------------------------|---------------------------------------|---------------------------------------|
| PT                     | 2.77%<br>(2.7%, 2.8%)<br>< 2.2e-16   | 3.82%<br>(3.7%, 3.9%)<br>< 2.2e-16  | 3.75%<br>(3.6%, 3.9%)<br>< 2.2e-16    | 4.73%<br>(4.6%, 4.8%)<br>< 2.2e-16    |
| PTWC                   | 1.83%<br>(1.8%, 1.9%)<br>< 2.2e-16   | 2.89%<br>(2.8%, 3%)<br>< 2.2e-16    | 2.82%<br>(2.7%, 2.9%)<br>< 2.2e-16    | 3.79%<br>(3.7%, 3.9%)<br>< 2.2e-16    |
| LD-Pred                | 1.94%<br>(1.8%, 2%)<br>< 2.2e-16     | 3.0%<br>(2.9%, 3.1%) <<br>2.2e-16   | 2.92%<br>(2.8%, 3.1%)<br>< 2.2e-16    | 3.9%<br>(3.8%, 4%)<br>< 2.2e-16       |
| PANPRS                 | 1.44%<br>(1.3%, 1.6%)<br>< 2.2e-16   | 2.5%<br>(2.4%, 2.6%)<br>< 2.2e-16   | 2.43%<br>(2.3%, 2.6%)<br>< 2.2e-16    | 3.4%<br>(3.2%, 3.6%)<br>< 2.2e-16     |
| PANPRS-Func            | 0.187%<br>(0.033%, 0.34%)<br>0.00851 | 1.24%<br>(1.1%, 1.4%)<br>< 2.2e-16  | 1.17%<br>(1.0%, 1.3%)<br>< 2.2e-16    | 2.15%<br>(2%, 2.3%)<br>< 2.2e-16      |
| PANPRS-<br>2traits     |                                      | 1.06%<br>(0.97%, 1.1%) <<br>2.2e-16 | 0.982%<br>(0.91%, 1.1%)<br>< 2.2e-16  | 1.96%<br>(1.9%, 2%)<br>< 2.2e-16      |
| PANPRS-Func<br>2traits |                                      |                                     | -0.0757%<br>(-0.19%, 0.036%)<br>0.091 | 0.901%<br>(0.81%, 0.99%) <<br>2.2e-16 |
| PANPRS-<br>4traits     |                                      |                                     |                                       | 0.977%<br>(0.89%, 1.1%)<br>< 2.2e-16  |

PANPRS-Func: PANPRS with functional annotation

PANPRS- 2 traits: PANPRS with 2 secondary traits

PANPRS- 4 traits: PANPRS with 4 secondary traits

PANPRS-Func-2 traits: PANPRS with functional annotation and 2 secondary traits

PANPRS-Func-4 traits: PANPRS with functional annotation and 4 secondary traits

Supplementary Table 11: The difference  $\Delta$  of  $R^2$  for each pair of methods and its 95% confidence interval based on bootstrap for analyzing the type 2 diabetes data. P-values for testing  $\Delta = 0$  is also reported based on bootstrap.

|                   | PTWC                            | LD-Pred                                  | PANPRS                                | PANPRS-Pleiotropy                 | PANPRS-Func                        | PANPRS-Func-P                      |
|-------------------|---------------------------------|------------------------------------------|---------------------------------------|-----------------------------------|------------------------------------|------------------------------------|
| PT                | 1.24%<br>(1.2%, 1.3%)<br>< 1e-5 | 1.2%<br>(1.2%, 1.2%)<br>< 1e-5           | 1.27%<br>(1.2%, 1.3%)<br>< 1e-5       | 1.5%<br>(1.5%, 1.5%)<br>< 1e-5    | 1.95%<br>(1.9%, 2.0%)<br>< 1e-5    | 2.24%<br>(2.2%, 2.3%)<br>< 1e-5    |
| PTWC              |                                 | -0.0402%<br>(-0.068%, -0.013%)<br>0.0018 | 0.0297%<br>(0.014%, 0.045%)<br>1e-05  | 0.26%<br>(0.23%, 0.29%)<br>< 1e-5 | 0.705%<br>(0.68%, 0.73%)<br>< 1e-5 | 0.995%<br>(0.96%, 1.0%)<br>< 1e-5  |
| LD-Pred           |                                 |                                          | 0.0699%<br>(0.042%, 0.098%)<br>< 1e-5 | 0.3%<br>(0.26%, 0.34%)<br>< 1e-5  | 0.745%<br>(0.71%, 0.78%)<br>< 1e-5 | 1.04%<br>(1.0%, 1.1%)<br>< 1e-5    |
| PANPRS            |                                 |                                          |                                       | 0.23%<br>(0.2%, 0.26%)<br>< 1e-5  | 0.675%<br>(0.65%, 0.7%)<br>< 1e-5  | 0.965%<br>(0.94%, 1%)<br>< 1e-5    |
| PANPRS-Pleiotropy |                                 |                                          |                                       |                                   | 0.445%<br>(0.42%, 0.47%)<br>< 1e-5 | 0.735%<br>(0.70%, 0.77%)<br>< 1e-5 |
| PANPRS-Func       |                                 |                                          |                                       |                                   |                                    | 0.29%<br>(0.27%, 0.32%)<br>< 1e-5  |

PANPRS: Single trait analysis without functional annotation or pleiotropy

PANPRS-Func: PANPRS with functional annotation

PANPRS-Pleiotropy: PANPRS with 16 secondary traits

PANPRS-Func-P: PANPRS with functional annotation and 16 secondary traits

Supplementary Table 12: The difference  $\Delta$  of  $R^2$  for each pair of methods and its 95% confidence interval based on bootstrap for analyzing the melanoma data. P-values for testing  $\Delta = 0$  is also reported based on bootstrap.

|                   | PTWC                                 | LD-Pred                            | PANPRS                                  | PANPRS-Pleiotropy                  | PANPRS-Func                           | PANPRS-Func-P                      |
|-------------------|--------------------------------------|------------------------------------|-----------------------------------------|------------------------------------|---------------------------------------|------------------------------------|
| PT                | 0.0585%<br>(0.031%, 0.086%)<br>2e-05 | 0.986%<br>(0.95%, 1%)<br>< 1e-5    | 0.999%<br>(0.97%, 1%)<br>< 1e-5         | 1.35%<br>(1.3%, 1.4%)<br>< 1e-5    | 1.16%<br>(1.1%, 1.2%)<br>< 1e-5       | 1.59%<br>(1.5%, 1.6%)<br>< 1e-5    |
| PTWC              |                                      | 0.928%<br>(0.89%, 0.96%)<br>< 1e-5 | 0.94%<br>(0.91%, 0.97%)<br>< 1e-5       | 1.29%<br>(1.3%, 1.3%)<br>< 1e-5    | 1.1%<br>(1.1%, 1.1%)<br>< 1e-5        | 1.53%<br>(1.5%, 1.6%)<br>< 1e-5    |
| LD-Pred           |                                      |                                    | 0.0127%<br>(-0.019%, 0.045%)<br>0.21641 | 0.364%<br>(0.32%, 0.4%)<br>< 1e-5  | 0.176%<br>(0.14%, 0.21%)<br>< 1e-5    | 0.606%<br>(0.55%, 0.66%)<br>< 1e-5 |
| PANPRS            |                                      |                                    |                                         | 0.351%<br>(0.32%, 0.39%)<br>< 1e-5 | 0.163%<br>(0.14%, 0.19%)<br>< 1e-5    | 0.593%<br>(0.54%, 0.64%)<br>< 1e-5 |
| PANPRS-Pleiotropy |                                      |                                    |                                         |                                    | -0.188%<br>(-0.22%, -0.15%)<br>< 1e-5 | 0.242%<br>(0.19%, 0.29%)<br>< 1e-5 |
| PANPRS-Func       |                                      |                                    |                                         |                                    |                                       | 0.43%<br>(0.38%, 0.48%)<br>< 1e-5  |

PANPRS: Single trait analysis without functional annotation or pleiotropy

PANPRS-Func: PANPRS with functional annotation

PANPRS-Pleiotropy: PANPRS with 7 secondary traits

PANPRS-Func-P: PANPRS with functional annotation and 7 secondary traits
